# Supplementary material for: Differences in Consumption Behaviour of Dietary Supplements in Competitive Athletes Depends on Sports Discipline
Source: MDPI journal article supplement (doi:10.3390/nu16030374), 2024-01-27
Supplement: s1 [file s1]

## Supplemental Materials

Current Versions of R libraries:

```
library("bookdown")
library("MASS")
library("cfa")      # "Configural Frequencies Analysis"
library("gplots")
library("lattice")
library("FactoMineR") # "Multivariate Exploratory Data Analysis
                      # and Data Mining"
library("factoextra") # Extract and Visualize the Results of
                      # Multivariate Data Analyses
library("Gifi")      # Multivariate Analysis with Optimal
                      # Scaling
library("Factoshiny") # "Perform factorial analysis with a menu
                      # and draw graphs interactively thanks to
                      #'FactoMineR' and a Shiny application."
library("CAinterprTools") # Precisely does what the name
                      # suggests ;- )
library("vcd")       # "Visualisation of Categorical Data"
library("xtable")
```
